# Supplementary material for: The GAs Extraction and Analyses system (GAEA) for immediate extraction and measurements of volatiles in the Hayabusa2 sample container
Source: Research Square preprint supplement (doi:10.21203/rs.3.rs-1257103/v1), 2022-01-31
Supplement: Supplementary file 1 [file 4901ea897da431ffe404b777.pdf]

# Additional file 1

## The GAs Extraction and Analyses system (GAEA) for immediate extraction and measurements of volatiles in the Hayabusa2 sample container

Yayoi N. Miura\*, Ryuji Okazaki, Yoshinori Takano, Kanako Sakamoto, Shogo Tachibana, Keita Yamada, Saburo Sakai and Hirotaka Sawada

\* Corresponding author: [yayoi@eri.u-tokyo.ac.jp](mailto:yayoi@eri.u-tokyo.ac.jp)

**Fig. S1** Design draws of gas bottles. **a** gas bottle at normal temperature and **b** gas bottle for cold-trap. The former bottle and pipet have the volume of 750 and 40 cm<sup>3</sup>, and the latter bottle have 50 and 15cm<sup>3</sup>, respectively.

**Fig. S2** Photographs of the GAEA set at the ISAS/JAXA (Sagamihara) and the QLF (Woomera).

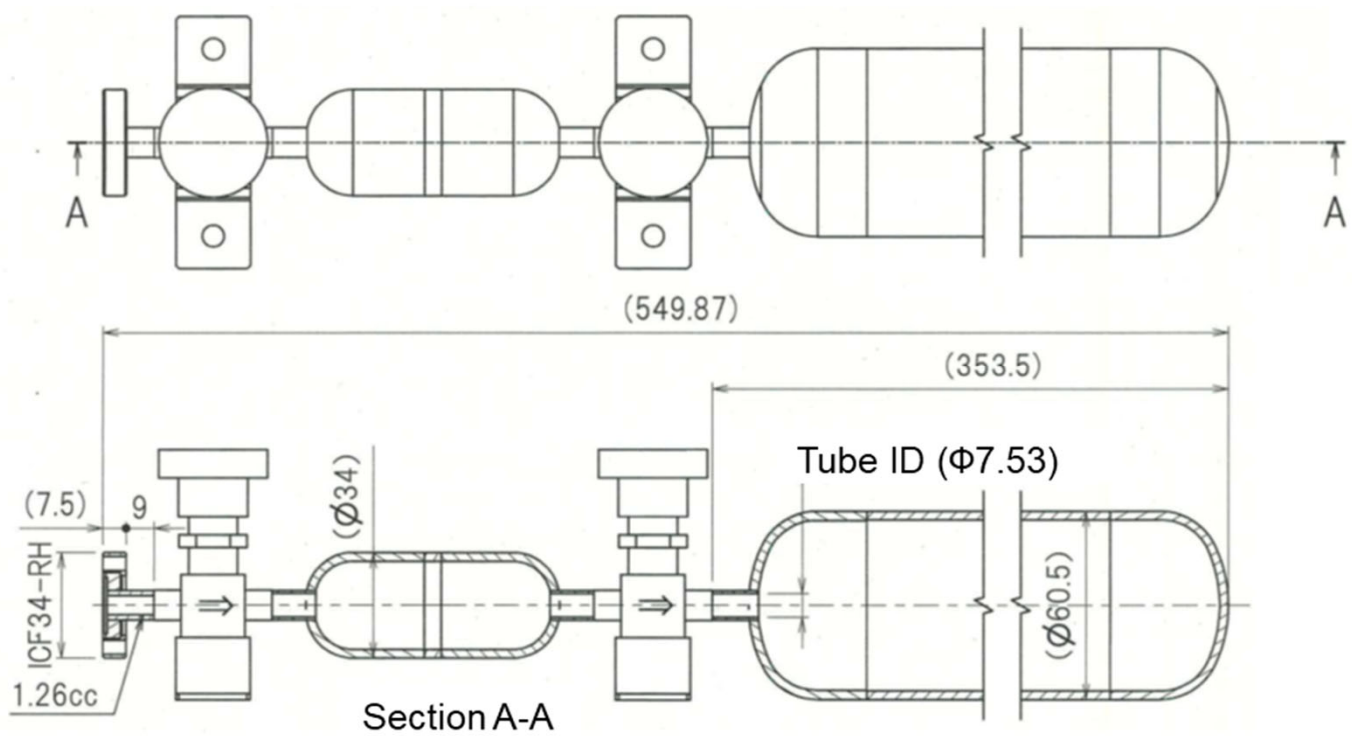

**Fig. S1a**

Design draw of the gas bottle at normal temperature (NT #1 - #6) . The volumes of the bottle and pipet are 750 and 40 cm<sup>3</sup>, respectively.

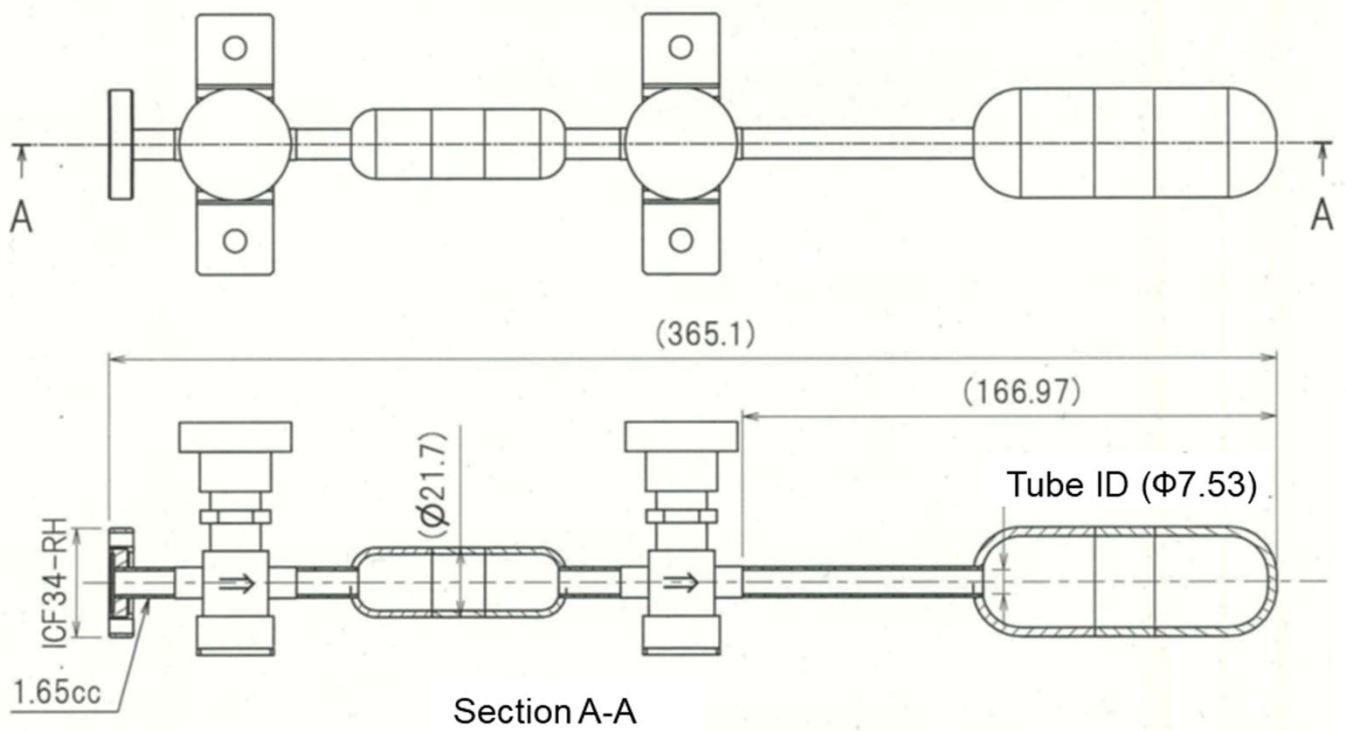

**Fig. S1b**

Design draw of the gas bottle for cold-trap (CR #1 - #3). The volumes of the bottle and pipet are 50 and 15 cm<sup>3</sup>, respectively.

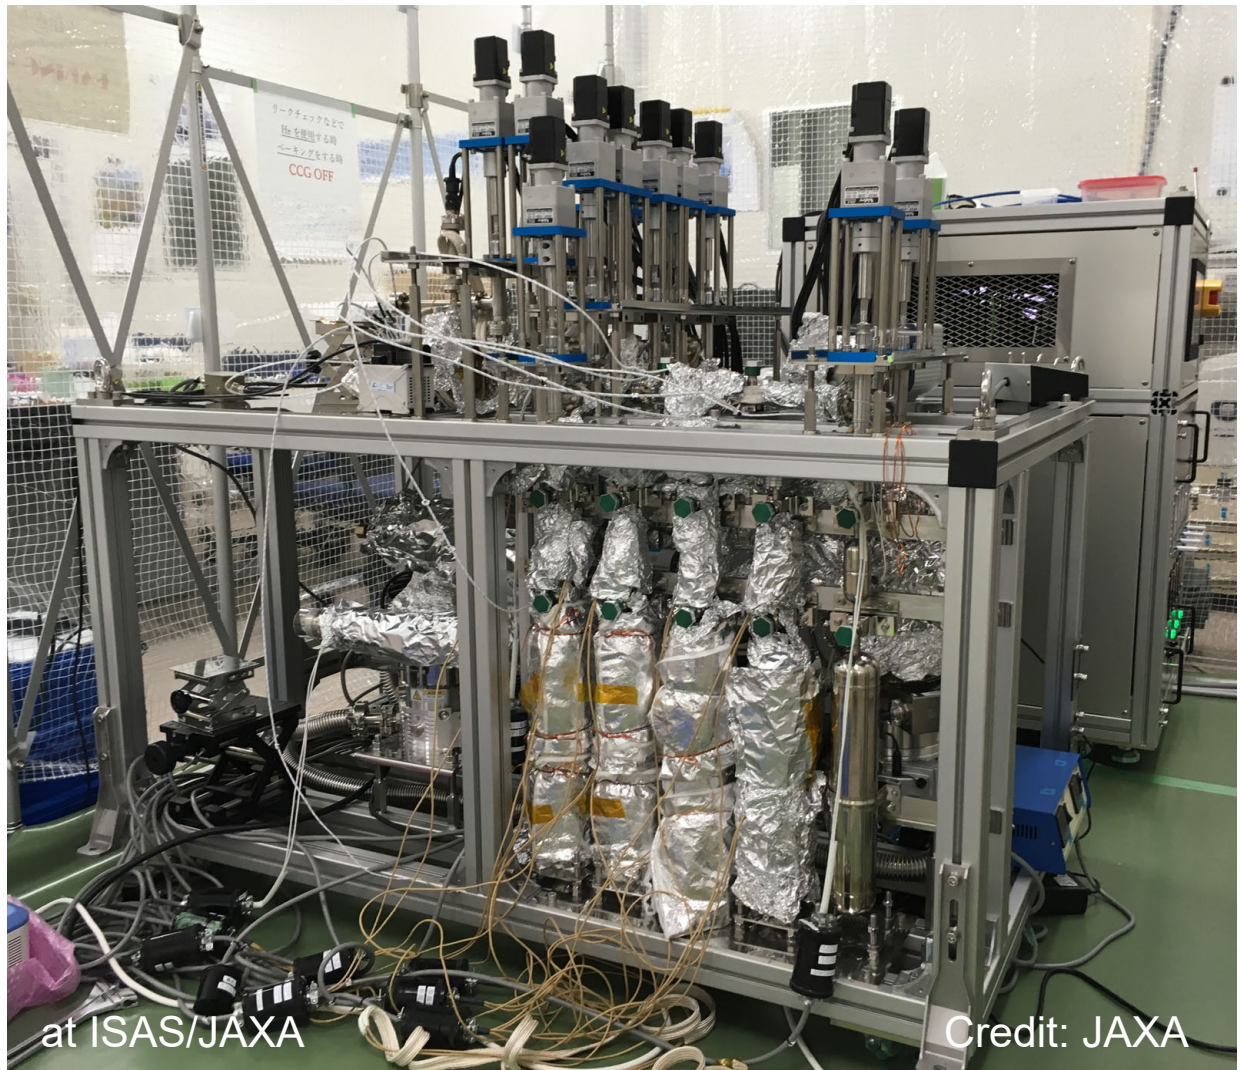

**Fig. S2**

Photographs of the GAEA set at the ISAS/JAXA (Sagamihara) and the QLF (Woomera).

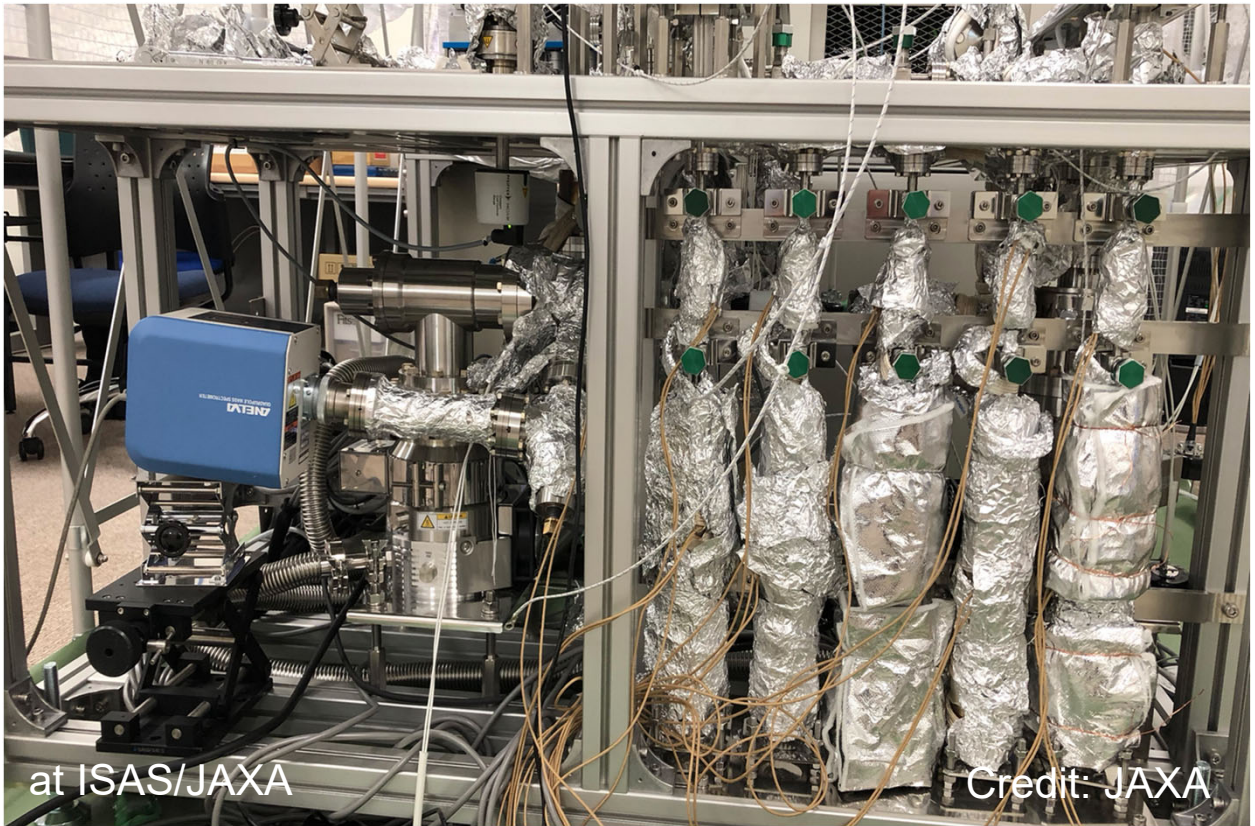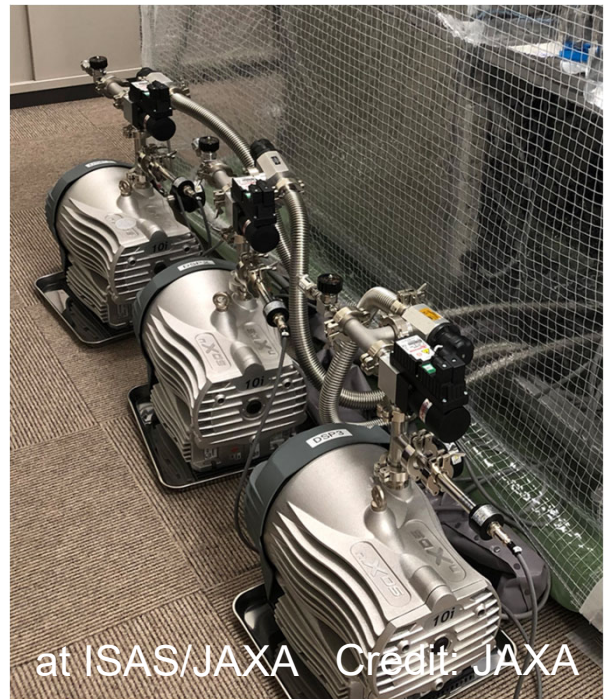

**Fig. S2** (continued).

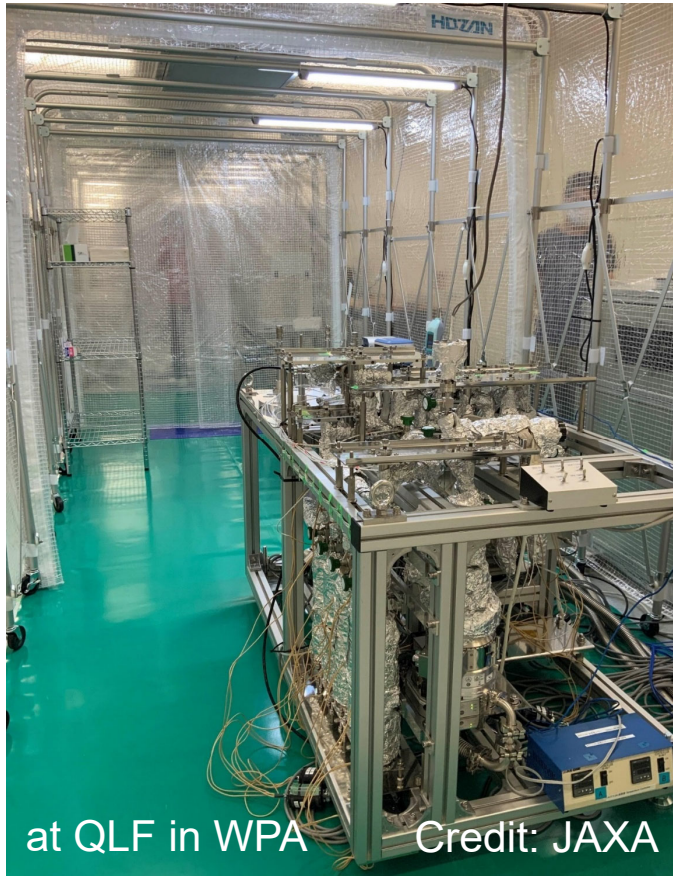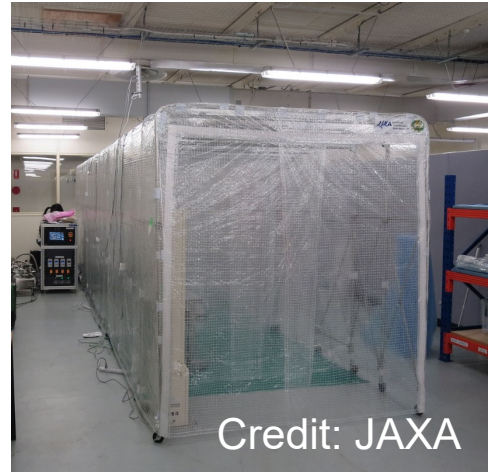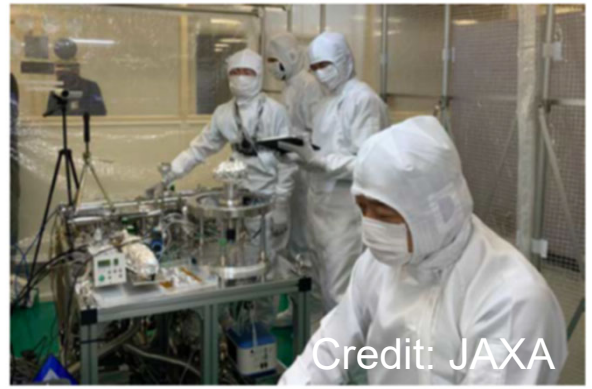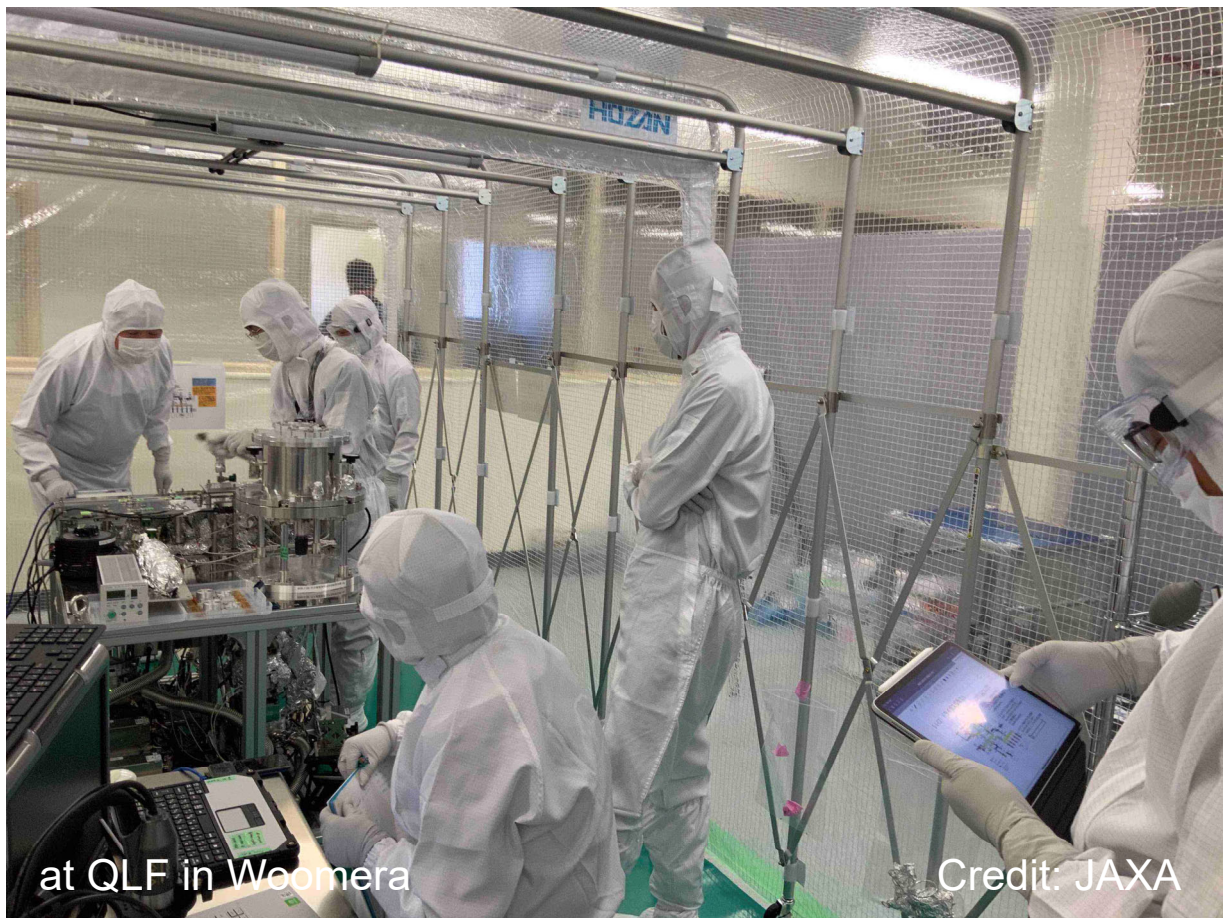

**Fig. S2 (continued).**
