# Supplementary material for: The GAs Extraction and Analyses system (GAEA) for immediate extraction and measurements of volatiles in the Hayabusa2 sample container
Source: Research Square preprint supplement (doi:10.21203/rs.3.rs-1257103/v1), 2022-01-31
Supplement: Supplementary file 2 [file 799368ccb95e527b6d117fa6.pdf]

**Table 1** Volumes of each gas-expanding area of the GAEA and gas bottles collecting Hayabusa2 container gases

| Area name     | volume<br>[cm <sup>3</sup> ] | Gas bottle                        | volume<br>[cm <sup>3</sup> ] |
|---------------|------------------------------|-----------------------------------|------------------------------|
| V-Container   | 200                          | Bottles at normal temperature     |                              |
| V-FL          | 15                           | NT #1 - #6                        | 750                          |
| V-Gauge       | 64                           | P-NT #1 - #6                      | 40                           |
| V-1           | 31.9                         | Bottles for cold-trap             |                              |
| V-2           | 36.4                         | CR #1 - #3                        | 50                           |
| V-3           | 36.5                         | P-CR #1 - #3                      | 15                           |
| V-PQ          | 15.5                         | P-: pipet attached to the bottle. |                              |
| V-SORB        | 25.6                         |                                   |                              |
| V-QMS (cross) | 33.3                         |                                   |                              |
| QMS (W)       | 296                          |                                   |                              |
| V-QMSW #      | 329                          |                                   |                              |
| V-NTTP        | 45.4                         |                                   |                              |
| V-OP          | 53.7                         |                                   |                              |
| V-CRTP        | 46.4                         |                                   |                              |

See Fig. 1 for area definition.

# V-QMSW = V-QMS (cross) + QMS (W).

**Table 2** Reduction factors of gases for measuring and collecting Hayabusa2 container gases using the GAEA

| Description                                                      | Reduction condition                                                                                                                                                                                                                                                                                                                   | Fraction |
|------------------------------------------------------------------|---------------------------------------------------------------------------------------------------------------------------------------------------------------------------------------------------------------------------------------------------------------------------------------------------------------------------------------|----------|
| Gases in the container after expanding to V-Gauge                | (V-Container/V-Container+V-FL+V-Gauge)                                                                                                                                                                                                                                                                                                | 0.717    |
| Gases kept in V-PQ for the QMS measurement <sup>a</sup>          | (V-PQ/V-Container+V-FL+V-Gauge+V-1+V-2+V-PQ)                                                                                                                                                                                                                                                                                          | 0.0428   |
| Gases collected in a NT bottle (each of NT #1 - #4) <sup>b</sup> | (V-Container+V-FL+V-Gauge+V-1+V-2/V-Container+V-FL+V-Gauge+V-1+V-2+V-PQ) × (NTbottle/V-Container+V-FL+V-Gauge+V-1+V-2+V-NTTP+4* NTbottle+4*P-NTbottle)                                                                                                                                                                                | 0.202    |
| Gases collected in CR #1 <sup>c</sup>                            | (V-Container+V-FL+V-Gauge+V-1+V-2/V-Container+V-FL+V-Gauge+V-1+V-2+V-PQ) × (V-Gauge+V-1+V-2+V-NTTP/V-Container+V-FL+V-Gauge+V-1+V-2+V-NTTP+4* NTbottle+4*P-NTbottle) × (CRbottle/V-Gauge+V-1+V-2+V-3+V-NTTP+V-CRTP+CRbottle+P-CRbottle)                                                                                               | 0.00736  |
| Gases collected in CR #2 <sup>c</sup>                            | (V-Container+V-FL+V-Gauge+V-1+V-2/V-Container+V-FL+V-Gauge+V-1+V-2+V-PQ) × (V-Gauge+V-1+V-2+V-NTTP/V-Container+V-FL+V-Gauge+V-1+V-2+V-NTTP+4* NTbottle+4*P-NTbottle) × (V-Gauge+V-1+V-2+V-3+V-NTTP+V-CRTP/V-Gauge+V-1+V-2+V-3+V-NTTP+V-CRTP+CRbottle+P-CRbottle) × (V-CRbottle/V-Gauge+V-1+V-2+V-3+V-NTTP+V-CRTP+CRbottle+P-CRbottle) | 0.00588  |
| Gases collected in NT #6                                         | V-Container+V-FL+V-Gauge+V-1+V-2/V-Container+V-FL+V-Gauge+V-1+V-2+V-PQ) × (V-Container+V-FL/V-Container+V-FL+V-Gauge+V-1+V-2+V-NTTP+4*NTbottle+4*P-NTbottle) × (V-Container+V-FL+V-Gauge+V-1+V-2/V-Container+V-FL+V-Gauge+V-1+V-2+V-PQ) × (NTbottle/V-Container+V-FL+V-Gauge+V-1+V-2+V-3+V-OP+NTbottle+P-NTbottle)                    | 0.0339   |

See Fig. 2 and Table 1 for the area names and volumes.

Fractions are calculated using the area volumes shown in Table 1.

<sup>a</sup> Gases kept in V-PQ are reduced before introducing into the QMS if the gas pressure is high.

<sup>b</sup> Fraction of gases collected in each bottle of NT #1 - #4.

<sup>c</sup> Fraction of gases collected in CR #1 or CR #2 for the case assuming at normal temperature.

**Table 3** Calibration condition, intensities of  $m/z$  28 and 40, and sensitivity of  $^{40}\text{Ar}$ 

| Calib. No                            | Date    | Area during meas. <sup>a</sup> | Pressure in QMS <sup>b</sup> [Pa] | Amount of $^{40}\text{Ar}$ in QMS [cm <sup>3</sup> STP] | I40 [A]  | I28/I40 | Sensitivity of $^{40}\text{Ar}$ <sup>c</sup> [cm <sup>3</sup> STP/A] |
|--------------------------------------|---------|--------------------------------|-----------------------------------|---------------------------------------------------------|----------|---------|----------------------------------------------------------------------|
| 8                                    | 7/8/20  | PQ-                            | 1.5E-05                           | 4.37E-10                                                | 7.94E-13 | 120     | 550                                                                  |
| 9                                    | 7/14/20 | PQ-                            | 1.5E-05                           | 4.33E-10                                                | 7.50E-13 | 184     | 577                                                                  |
| 10 (a)                               | 7/21/20 | PQ-                            | 1.5E-05                           | 4.29E-10                                                | 5.35E-13 | 90      | 802                                                                  |
| 10 (b)                               |         | V2-                            | 3.1E-05                           | 1.00E-09                                                | 1.70E-12 | 101     | 535                                                                  |
| 10 (c)                               |         | Vga-                           | 6.6E-05                           | 2.65E-09                                                | 3.50E-12 | 95      | 587                                                                  |
| 11 (a)                               | 8/18/20 | PQ-                            | 1.5E-05                           | 4.25E-10                                                | 4.92E-13 | 89      | 867                                                                  |
| 11 (b)                               |         | V2-                            | 3.1E-05                           | 9.96E-10                                                | 1.56E-12 | 87      | 563                                                                  |
| 11 (c)                               |         | V1-                            | 2.5E-05                           | 8.74E-10                                                | 1.00E-12 | 98      | 730                                                                  |
| 11 (d)                               |         | Vga-                           | 4.4E-05                           | 1.75E-09                                                | 2.00E-12 | 100     | 634                                                                  |
| 12                                   | 9/16/20 | PQ-                            | 1.5E-05                           | 4.21E-10                                                | 8.05E-13 | 165     | 527                                                                  |
| 13 (a)                               |         | PQ-                            | 6.0E-06                           | 1.73E-10                                                | 2.65E-13 | 182     | 640                                                                  |
| 13 (b)                               |         | Vga-                           | 3.9E-06                           | 1.55E-10                                                | 1.44E-13 | 656     | 798                                                                  |
| Average of all data:                 |         |                                |                                   |                                                         |          | 164     | 651                                                                  |
|                                      |         |                                |                                   |                                                         |          | ±159    | ±119                                                                 |
| Average of data on 7/21<br>and 8/18: |         |                                |                                   |                                                         |          | 94      | 653                                                                  |
|                                      |         |                                |                                   |                                                         |          | ±6      | ±125                                                                 |

Quantitative terrestrial atmosphere was used as calibration gas. Volume fraction of  $^{40}\text{Ar}$  is 0.0093.

<sup>a</sup> Areas to which calibration gases were introduced for the QMS measurements.

PQ-: [V-PQ + V-QMSW], V2-: [V-2 + V-PQ + V-QMSW], V1-: [V-1 + V-2 + V-PQ + V-QMSW], Vga-: [V-Gauge + V-1 + V-2 + V-PQ + V-QMSW]

<sup>b</sup> Pressures in the QMS during analyses are calculated based on the gas amounts and area volumes.

<sup>c</sup> Sensitivities are calculated using the measured data at 54 sec after introducing gases into the QMS.

All sensitivities are corrected as the analytical volume conditions to be [V-PQ + V-QMSW].

**Table 4** Specifications and measured ranges of  $m/z$  for the QMS (Watmass) of the GAEA.

| Specification    |                                   |
|------------------|-----------------------------------|
| Filament         | Y <sub>2</sub> O <sub>3</sub> -Ir |
| Emission current | 2 mA                              |
| Electron energy  | 70 eV                             |
| SEM voltage      | 900 V                             |
| Integration time | 32 msec                           |

  

| Mode                | SORB-AC <sup>a</sup> | Scan time <sup>b</sup> | $m/z$                                                                                                                   |
|---------------------|----------------------|------------------------|-------------------------------------------------------------------------------------------------------------------------|
| Recipe 1. Peak scan | close                | ~120 sec (~6 scan)     | peak scan from 1 to 100                                                                                                 |
| Recipe 2. Peak jump | close                | ~90 sec                | peak jump at 2, 3, 4, 14, 15, 16, 17, 18, 28, 29, 32, 34, 40, 44, 45, 46, 64, 66, 69, 78                                |
| Recipe 3. Peak scan | open                 | ~90 sec (~10 scan)     | peak scan from 1 to 44                                                                                                  |
| Recipe 4. Peak jump | open                 | ~90 sec                | peak jump at 1, 2, 3, 4, 6, 12, 16, 18, 20, 21, 22, 24, 28, 29, 30, 32, 33, 34, 36, 38, 40, 44, 45, 46, 69, 78, 84, 132 |
| Recipe 5. Peak scan |                      | optional               | peak scan from 1 to 200                                                                                                 |

A procedure plan used for the measurements of gases in the Hayabusa2 sample container.

Measurements are performed sequentially from Recipe 1 to Recipe 4 in each gas fraction.

Recipe 5 is also applied in the case where gas amount is high.

<sup>a</sup> Gases are measured without SORB-AC, and then with SORB-AC by opening the valve.

<sup>b</sup> Basic scan time is shown here. It is manually operated according to measured gas amounts and compositions.
